# Supplementary material for: A measurement system for CO 2 and CH 4 emissions quantification of industrial sites using a new in situ concentration sensor operated on board uncrewed aircraft vehicles
Source: Copernicus journal article supplement (doi:10.5194/amt-17-4471-2024), 2024-07-26
Supplement: Supplementary file 1 [file amt-17-4471-2024-supplement.pdf]

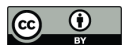

*Supplement of*

**A measurement system for CO<sub>2</sub> and CH<sub>4</sub> emissions quantification of industrial sites using a new in situ concentration sensor operated on board uncrewed aircraft vehicles**

**Jean-Louis Bonne et al.**

*Correspondence to:* Jean-Louis Bonne ([jean-louis.bonne@univ-reims.fr](mailto:jean-louis.bonne@univ-reims.fr)) and Lilian Joly ([lilian.joly@univ-reims.fr](mailto:lilian.joly@univ-reims.fr))

The copyright of individual parts of the supplement might differ from the article licence.

| Test ID       | Real flow (g/s) | All tests average |                    | By test         |                    |                                                     |                          |                                 |                              |
|---------------|-----------------|-------------------|--------------------|-----------------|--------------------|-----------------------------------------------------|--------------------------|---------------------------------|------------------------------|
|               |                 | Quantified flow   |                    | Quantified flow |                    | $\overline{WS}_{1.5m} \pm \sigma_{WS_{1.5m}}$ (m/s) | $\sigma_{WD_{1.5m}}$ (°) | Median $\sigma_{CH_4,1s}$ (ppb) | CH <sub>4</sub> signal/noise |
|               |                 | Flow (g/s)        | Relative error (%) | Flow (g/s)      | Relative error (%) |                                                     |                          |                                 |                              |
| 2019W40-01    | 9.5             | 10.6              | 12%                | 11.6            | 22%                | 1.8 ± 0.9                                           | 18.74                    | 61.40                           | 4767                         |
|               |                 |                   |                    | 9.7             | 2%                 | 1.6 ± 0.5                                           | 15.58                    | 55.87                           | 5321                         |
| 2019W40-05    | 30.0            | 21.4              | -29%               | 24.7            | -18%               | 3.0 ± 0.6                                           | 12.44                    | 68.99                           | 4278                         |
|               |                 |                   |                    | 18.2            | -39%               | 3.5 ± 1.1                                           | 11.55                    | 61.71                           | 4694                         |
| 2019W40-02    | 1.0             | 0.9               | -6%                | 0.9             | -6%                | 3.1 ± 1.0                                           | 23.32                    | 84.89                           | 298                          |
| 2019W40-06BIS | 3.0             | 5.5               | 85%                | 5.5             | 85%                | 0.8 ± 0.2                                           | 28.32                    | 38.57                           | 5983                         |
| 2019W40-08    | 5.0             | 2.6               | -48%               | 1.9             | -61%               | 0.6 ± 0.3                                           | 40.25                    | 74.45                           | 1104                         |
|               |                 |                   |                    | 3.3             | -35%               | 2.3 ± 0.5                                           | 12.36                    | 48.57                           | 1277                         |
| 2019W40-16B   | 1.5             | 0.7               | -54%               | 0.7             | -54%               | 1.2 ± 0.5                                           | 39.65                    | 72.30                           | 1321                         |
| 2019W40-07    | 0.5             | 0.4               | -14%               | 0.4             | -14%               | 1.7 ± 0.5                                           | 18.77                    | 54.99                           | 271                          |
| 2019W40-13    | 0.2             | 0.1               | -21%               | 0.1             | -21%               | 2.6 ± 1.1                                           | 25.33                    | 84.71                           | 162                          |
| 2019W40-14    | 1.0             | 2.2               | 125%               | 2.2             | 125%               | 0.7 ± 0.4                                           | 27.46                    | 46.67                           | 4043                         |
| 2019W40-16AB  | 1.5             | 0.9               | -38%               | 0.9             | -38%               | 0.5 ± 0.1                                           | 9.34                     | 295.97                          | 125                          |
| 2019W40-17    | 2.0             | 1.2               | -40%               | 1.2             | -40%               | 2.3 ± 0.5                                           | 17.91                    | 150.61                          | 139                          |
| 2019W41-01    | 2.0             | 1.5               | -24%               | 1.5             | -24%               | 2.0 ± 0.5                                           | 12.38                    | 123.09                          | 1206                         |
| 2019W41-02    | 4.0             | 1.7               | -58%               | 1.7             | -58%               | 1.2 ± 0.4                                           | 17.73                    | 82.60                           | 3521                         |
| 2019W41-05AB  | 6.0             | 1.9               | -69%               | 1.5             | -75%               | 1.7 ± 0.6                                           | 40.44                    | 112.78                          | 386                          |
|               |                 |                   |                    | 2.3             | -62%               | 0.6 ± 0.2                                           | 93.52                    | 85.76                           | 3400                         |
| 2019W41-06    | 1.0             | 0.7               | -30%               | 0.7             | -30%               | 0.7 ± 0.4                                           | 61.36                    | 92.08                           | 1916                         |
| 2019W41-07    | 1.0             | 0.7               | -32%               | 0.6             | -38%               | 0.7 ± 0.4                                           | 41.23                    | 78.75                           | 3314                         |
|               |                 |                   |                    | 0.8             | -24%               | 0.7 ± 0.4                                           | 41.44                    | 76.62                           | 1704                         |
|               |                 |                   |                    | 0.7             | -35%               | 0.5 ± 0.2                                           | 62.19                    | 80.41                           | 1811                         |
| 2019W41-08    | 2.0             | 1.1               | -45%               | 1.5             | -24%               | 1.3 ± 0.2                                           | 12.50                    | 130.63                          | 868                          |
|               |                 |                   |                    | 0.7             | -67%               | 1.3 ± 0.3                                           | 9.72                     | 70.89                           | 559                          |
| 2019W41-SAT   | 150.0           | 68.4              | -54%               | 66.4            | -56%               | 0.5 ± 0.2                                           | 28.00                    | 223.15                          | 1353                         |
|               |                 |                   |                    | 70.4            | -53%               | 0.6 ± 0.2                                           | 51.74                    | 176.45                          | 1711                         |
| 2019W41-11AB  | 1.0             | 0.9               | -5%                | 0.8             | -16%               | 2.6 ± 0.8                                           | 22.75                    | 189.66                          | 270                          |
|               |                 |                   |                    | 1.1             | 6%                 | 2.5 ± 0.7                                           | 21.35                    | 200.13                          | 510                          |
| 2019W41-13    | 5.0             | 8.3               | 66%                | 10.3            | 107%               | 2.9 ± 0.8                                           | 16.02                    | 204.12                          | 1178                         |
|               |                 |                   |                    | 6.3             | 25%                | 3.0 ± 0.8                                           | 13.91                    | 183.51                          | 1086                         |
| 2019W41-12    | 0.4             | 0.3               | -29%               | 0.3             | -29%               | 2.8 ± 0.7                                           | 21.42                    | 159.50                          | 50                           |
| 2019W41-09    | 0.5             | 0.8               | 54%                | 0.7             | 48%                | 2.9 ± 0.8                                           | 15.74                    | 156.14                          | 355                          |
|               |                 |                   |                    | 0.8             | 60%                | 2.9 ± 0.7                                           | 19.34                    | 182.26                          | 318                          |
| 2019W41-16    | 0.6             | 0.6               | 4%                 | 0.4             | -34%               | 0.4 ± 0.1                                           | 72.95                    | 191.83                          | 193                          |
|               |                 |                   |                    | 0.8             | 41%                | 0.9 ± 0.4                                           | 68.96                    | 174.91                          | 284                          |
| 2019W41-17    | 1.0             | 1.6               | 60%                | 1.4             | 36%                | 1.0 ± 0.6                                           | 69.14                    | 241.00                          | 358                          |
|               |                 |                   |                    | 1.8             | 83%                | 0.8 ± 0.4                                           | 58.80                    | 163.19                          | 489                          |
| 2019W41-18    | 2.0             | 3.9               | 93%                | 3.9             | 93%                | 1.2 ± 0.6                                           | 27.64                    | 216.54                          | 1281                         |
| 2019W41-23AB  | 3.0             | 4.5               | 48%                | 2.9             | -2%                | 2.0 ± 0.7                                           | 12.16                    | 260.45                          | 678                          |
|               |                 |                   |                    | 6.0             | 99%                | 1.1 ± 0.4                                           | 23.08                    | 256.14                          | 1110                         |

Table S1. Known true values and estimates by our quantification method of CH<sub>4</sub> emissions flow rates for all successful quantification flights, for the TADI 2019 campaign, mean wind speed at 1.5m altitude, relative standard deviation of the wind at 1.5m, median value of the 1s rolling standard deviation of CH<sub>4</sub> (ppb) and ratio of the 1s rolling standard deviation and of the amplitude of variation of CH<sub>4</sub> (%). For the averaged values of all tests, relative errors between estimates and known true values are presented in (%), with values between -20 % and +20 % in bold characters, values between -50 % and +100 % in italics and values outside these ranges underlined. Mean wind speed at 1.5m values below 2.3 m/s and standard deviations of wind direction above 33.1° are presented in bold characters.

| Test ID       | Real flow (g/s) | All tests average |                    | By test         |                    |                                                     |                          |                                 |                              |
|---------------|-----------------|-------------------|--------------------|-----------------|--------------------|-----------------------------------------------------|--------------------------|---------------------------------|------------------------------|
|               |                 | Quantified flow   |                    | Quantified flow |                    | $\overline{WS}_{1.5m} \pm \sigma_{WS_{1.5m}}$ (m/s) | $\sigma_{WD_{1.5m}}$ (°) | Median $\sigma_{CH_4,1s}$ (ppb) | CH <sub>4</sub> signal/noise |
|               |                 | Flow (g/s)        | Relative error (%) | Flow (g/s)      | Relative error (%) |                                                     |                          |                                 |                              |
| 2021W36/07-4  | 0.1             | 0.10              | -3%                | 0.088           | -12%               | 1.9 ± 0.4                                           | 27.42                    | 23.47                           | 239                          |
|               |                 |                   |                    | 0.115           | 15%                | 2.2 ± 0.4                                           | 21.61                    | 22.34                           | 147                          |
|               |                 |                   |                    | 0.088           | -12%               | 2.4 ± 0.4                                           | 11.13                    | 18.40                           | 488                          |
| 2021W36/08-5  | 0.2             | 0.31              | 57%                | 0.473           | 137%               | 0.9 ± 0.4                                           | 54.87                    | 32.45                           | 605                          |
|               |                 |                   |                    | 0.251           | 25%                | 1.0 ± 0.4                                           | 23.02                    | 29.76                           | 618                          |
|               |                 |                   |                    | 0.218           | 9%                 | 0.6 ± 0.2                                           | 67.75                    | 26.35                           | 561                          |
| 2021W36/08-6  | 0.1             | 0.13              | 28%                | 0.106           | 6%                 | 0.8 ± 0.4                                           | 42.78                    | 27.01                           | 242                          |
|               |                 |                   |                    | 0.151           | 51%                | 1.0 ± 0.4                                           | 60.55                    | 39.12                           | 206                          |
| 2021W36/08-7  | 0.3             | 0.22              | -28%               | 0.216           | -28%               | 1.0 ± 0.3                                           | 41.06                    | 35.99                           | 121                          |
| 2021W36/08-8  | 2.4             | 3.04              | 27%                | 1.794           | -25%               | 1.5 ± 0.6                                           | 24.29                    | 29.49                           | 8017                         |
|               |                 |                   |                    | 4.279           | 78%                | 1.5 ± 0.5                                           | 34.62                    | 28.78                           | 5862                         |
| 2021W36/08-9  | 0.6             | 0.26              | -57%               | 0.258           | -57%               | 1.4 ± 0.4                                           | 41.72                    | 31.52                           | 259                          |
| 2021W36/08-10 | 1.7             | 3.63              | 114%               | 3.161           | 86%                | 1.1 ± 0.6                                           | 63.01                    | 28.73                           | 1937                         |
|               |                 |                   |                    | 4.107           | 142%               | 2.2 ± 0.5                                           | 16.09                    | 20.33                           | 2878                         |
| 2021W36/08-11 | 0.25            | 0.30              | 21%                | 0.302           | 21%                | 1.9 ± 0.3                                           | 9.97                     | 16.77                           | 550                          |
| 2021W36/09-12 | 0.4             | 0.22              | -46%               | 0.217           | -46%               | 0.8 ± 0.1                                           | 2.10                     | 33.12                           | 971                          |
| 2021W36/09-13 | 3               | 2.11              | -30%               | 2.112           | -30%               | 0.58 ± 0.02                                         | 44.26                    | 33.29                           | 5851                         |
| 2021W36/09-14 | 0.2             | 0.24              | 19%                | 0.148           | -26%               | 1.2 ± 0.2                                           | 8.23                     | 41.50                           | 116                          |
|               |                 |                   |                    | 0.263           | 31%                | 1.7 ± 0.1                                           | 6.24                     | 24.41                           | 766                          |
|               |                 |                   |                    | 0.285           | 43%                | 1.5 ± 0.2                                           | 0.85                     | 21.14                           | 666                          |
|               |                 |                   |                    | 0.260           | 30%                | 1.5 ± 0.1                                           | 4.73                     | 31.17                           | 331                          |
| 2021W36/09-15 | 0.08            | 0.20              | 149%               | 0.226           | 182%               | 2.6 ± 0.4                                           | 3.48                     | 33.22                           | 132                          |
|               |                 |                   |                    | 0.173           | 117%               | 2.99 ± 0.02                                         | 0.64                     | 16.73                           | 252                          |
| 2021W36/09-16 | 0.075           | 0.09              | 19%                | 0.079           | 6%                 | 3.6 ± 0.3                                           | 8.93                     | 35.87                           | 132                          |
|               |                 |                   |                    | 0.099           | 32%                | 2.71 ± 0.04                                         | 5.21                     | 21.22                           | 98                           |
| 2021W36/09-17 | 0.375           | 0.35              | -8%                | 0.372           | -1%                | 3.7 ± 0.2                                           | 2.60                     | 40.84                           | 246                          |
|               |                 |                   |                    | 0.322           | -14%               | 3.6 ± 0.1                                           | 1.32                     | 20.86                           | 401                          |
| 2021W36/09-18 | 2               | 2.37              | 19%                | 1.367           | -32%               | 3.0 ± 0.1                                           | 3.05                     | 37.37                           | 1387                         |
|               |                 |                   |                    | 2.800           | 40%                | 2.9 ± 0.1                                           | 0.31                     | 38.02                           | 874                          |
|               |                 |                   |                    | 3.266           | 63%                | 3.5 ± 0.2                                           | 1.87                     | 35.99                           | 1444                         |
|               |                 |                   |                    | 2.052           | 3%                 | 3.0 ± 0.1                                           | 1.27                     | 18.30                           | 1214                         |
| 2021W36/09-19 | 0.01            | 0.017             | 70%                | 0.021           | 111%               | 2.5 ± 0.1                                           | 3.82                     | 38.03                           | 148                          |
|               |                 |                   |                    | 0.007           | -30%               | 2.71 ± 0.02                                         | 1.18                     | 20.31                           | 38                           |
|               |                 |                   |                    | 0.023           | 130%               | 2.8 ± 0.1                                           | 1.79                     | 28.33                           | 64                           |
| 2021W36/09-20 | 5               | 4.75              | -5%                | 4.755           | -5%                | 2.1 ± 0.1                                           | 6.99                     | 46.36                           | 5360                         |
| 2021W36/10-21 | 0.3             | 0.38              | 26%                | 0.138           | -54%               | 0.8 ± 0.3                                           | 23.42                    | 40.76                           | 1022                         |
|               |                 |                   |                    | 0.289           | -4%                | 0.7 ± 0.3                                           | 26.06                    | 30.07                           | 589                          |
|               |                 |                   |                    | 0.569           | 90%                | 0.6 ± 0.3                                           | 35.03                    | 31.53                           | 999                          |
|               |                 |                   |                    | 0.514           | 71%                | 0.6 ± 0.2                                           | 37.34                    | 53.24                           | 265                          |
| 2021W36/10-22 | 0.6             | 0.57              | -5%                | 0.461           | -23%               | 1.3 ± 0.3                                           | 9.53                     | 25.12                           | 884                          |
|               |                 |                   |                    | 0.677           | 13%                | 2.1 ± 0.4                                           | 9.31                     | 28.69                           | 479                          |

Table S2. Same as Table S2 for the results of the 2021 TADI campaign

| Platform | Run ID | Duration (min) | Distance to platform (m) | Quantification (Y/N) |                 | WS at drone elevation (m.s <sup>-1</sup> ) |        | WD at drone elevation (°) | Signal/noise    |                 |
|----------|--------|----------------|--------------------------|----------------------|-----------------|--------------------------------------------|--------|---------------------------|-----------------|-----------------|
|          |        |                |                          | CH <sub>4</sub>      | CO <sub>2</sub> | Mean                                       | Stdev. | Stdev.                    | CH <sub>4</sub> | CO <sub>2</sub> |
| P1       | 1_P1   | 11             | 450                      | N                    | N               | 9.3                                        | 3.1    | 8.5                       | 697             | 86              |
| P1       | 2_P1   | 10             | 450                      | Y                    | Y               | 9.3                                        | 2.8    | 7.9                       | <b>103</b>      | <b>66</b>       |
| P1       | 3_P1   | 19             | 450                      | Y                    | Y               | 10.1                                       | 2.2    | 6.7                       | <b>78</b>       | <b>92</b>       |
| P1       | 4_P1   | 17             | 130                      | Y                    | Y               | 10.4                                       | 1.7    | 5.2                       | <b>2468</b>     | <b>523</b>      |
| P1       | 5_P1   | 11             | 160                      | Y                    | Y               | 9.2                                        | 1.5    | 4.2                       | <b>1625</b>     | <b>398</b>      |
| P1       | 6_P1   | 11             | 150                      | Y                    | Y               | 8.6                                        | 1.4    | 4.3                       | <b>1970</b>     | <b>454</b>      |
| P1       | 7_P1   | 12             | 160                      | Y                    | Y               | 7.4                                        | 3.0    | 10.0                      | <b>1413</b>     | <b>328</b>      |
| P1       | 8_P1   | 10             | 160                      | Y                    | Y               | 8.4                                        | 1.7    | 6.9                       | <b>1204</b>     | <b>303</b>      |
| P2       | 1_P2   | 10             | 420                      | N                    | N               | 9.2                                        | 2.7    | 9.2                       | 186             | 132             |
| P2       | 2_P2   | 16             | 420                      | Y                    | N               | 9.9                                        | 1.9    | 4.9                       | <b>265</b>      | 165             |
| P2       | 3_P2   | 18             | 420                      | Y                    | N               | 9.1                                        | 2.6    | 7.2                       | <b>1049</b>     | 83              |
| P2       | 4_P2   | 16             | 420                      | Y                    | Y               | 10.4                                       | 2.3    | 9.0                       | <b>4337</b>     | <b>93</b>       |
| P2       | 5_P2   | 10             | 260                      | Y                    | Y               | 10.5                                       | 2.7    | 10.0                      | <b>437</b>      | <b>84</b>       |
| P2       | 6_P2   | 11             | 350                      | Y                    | Y               | 9.7                                        | 4.0    | 14.4                      | <b>1047</b>     | <b>106</b>      |
| P2       | 7_P2   | 10             | 350                      | y                    | Y               | 10.6                                       | 2.9    | 10.0                      | <b>336</b>      | <b>117</b>      |

Table S3. List of all flights operated during on 19 April 2019 for the monitoring of the P1 and P2 platforms emissions, with duration of the flight, approximate distance between the flight plane and the platform, validity for the CH<sub>4</sub> or CO<sub>2</sub> emissions quantification (Y if valid, N if not valid), average and standard deviation of the wind speed at UAV elevation (m.s<sup>-1</sup>), standard deviation of the wind direction at UAV elevation (°), signal to noise ratio of the CH<sub>4</sub> and CO<sub>2</sub> concentrations (bold characters for the flights were the emissions quantification have been used calculated for each species).

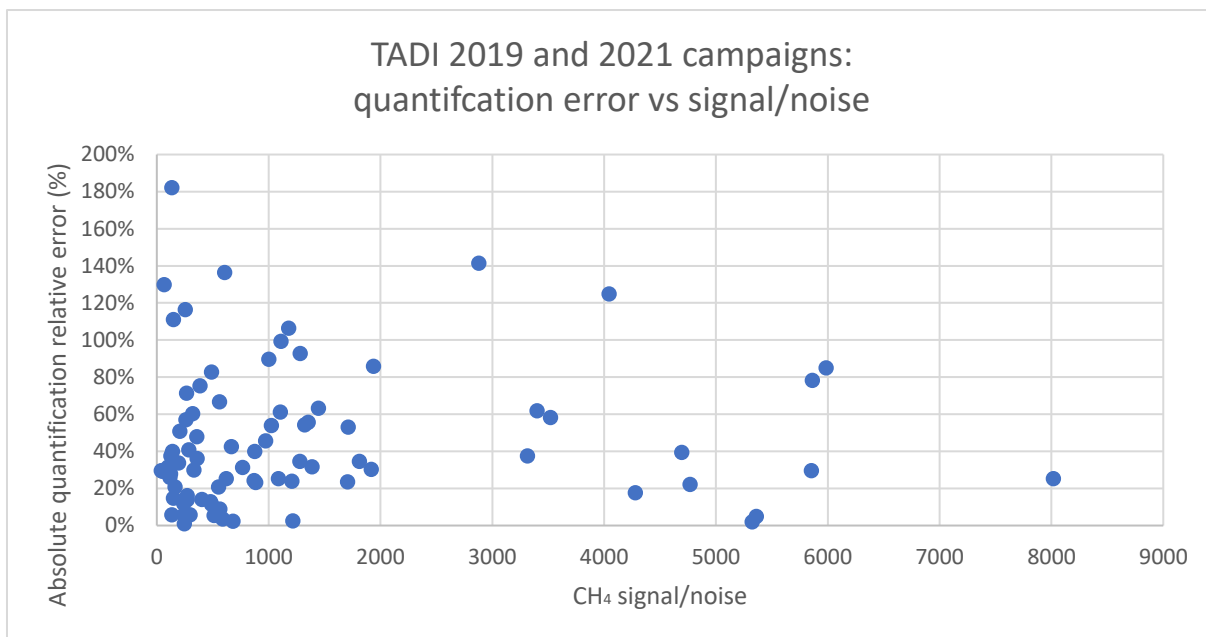

**Figure S1.** Absolute values of the relative errors of quantification (%) as a function of the CH<sub>4</sub> signal to noise ratio, for all individual flight of the TADI 2019 and TADI 2021 campaigns.

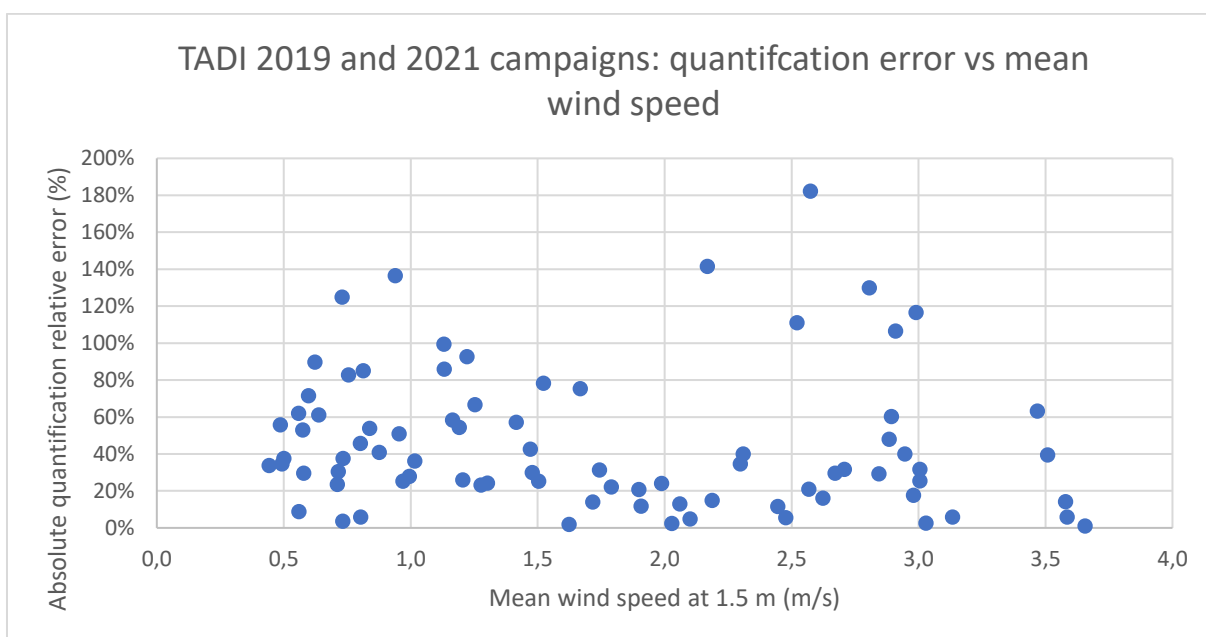

**Figure S2.** Same as Figure S1 but for absolute values of the relative errors of quantification (%) as a function of the mean wind speed (m.s<sup>-1</sup>).

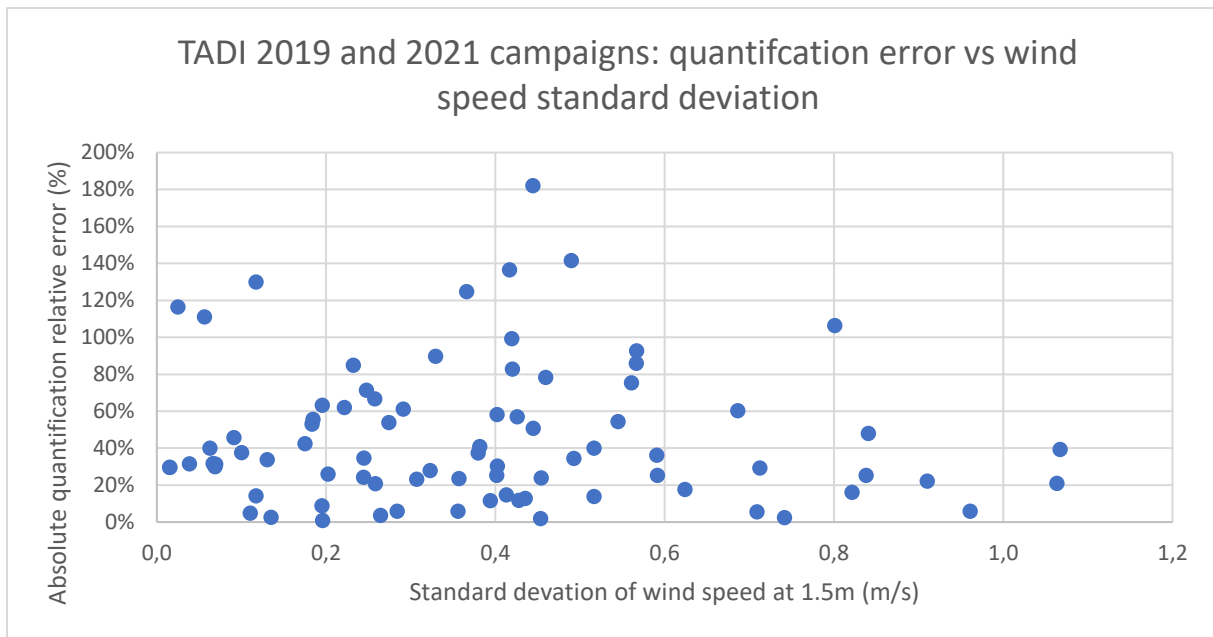

**Figure S3.** Same as Figure S1 but for absolute values of the relative errors of quantification (%) as a function of the standard deviation of the wind speed ( $\text{m}\cdot\text{s}^{-1}$ ).

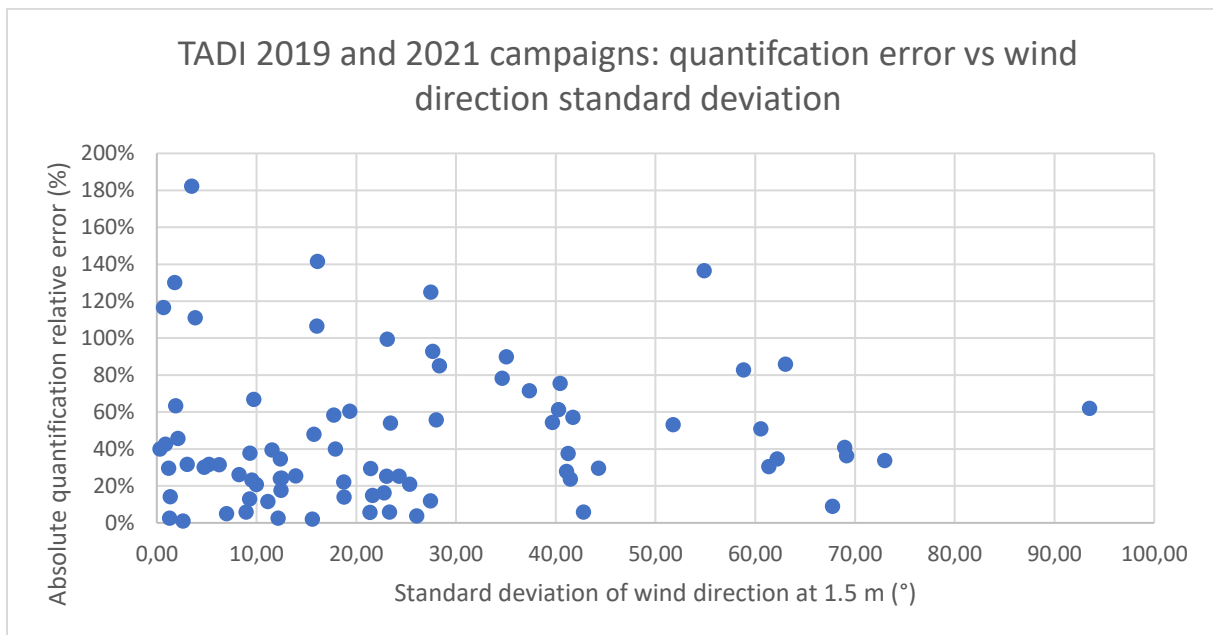

**Figure S4.** Same as Figure S1 but for absolute values of the relative errors of quantification (%) as a function of the standard deviation of the wind direction ( $^{\circ}$ ).
